# Supplementary material for: Fully Printed PEDOT:PSS-based Temperature Sensor with High Humidity Stability for Wireless Healthcare Monitoring
Source: PubMed Central journal article supplement (PMC7016104; doi:10.1038/s41598-020-59432-2), 2020-02-12
Supplement: 41598_2020_59432_MOESM1_ESM.pdf [file 41598_2020_59432_MOESM1_ESM.pdf]

# Supporting Information

## **Fully Printed PEDOT:PSS-based Temperature Sensor with High Humidity Stability for Wireless Healthcare Monitoring**

*Yi-Fei Wang, \* Tomohito Sekine, Yasunori Takeda, Koji Yokosawa, Hiroyuki Matsui, Daisuke Kumaki, Takeo Shiba, Takao Nishikawa, and Shizuo Tokito \**

Research Center for Organic Electronics, Yamagata University,  
4-3-16, Jonan, Yonezawa, Yamagata, 992-8510, Japan

**E-mail:** wang@yz.yamagata-u.ac.jp (Y. F. Wang);  
tokito@yz.yamagata-u.ac.jp (S. Tokito)

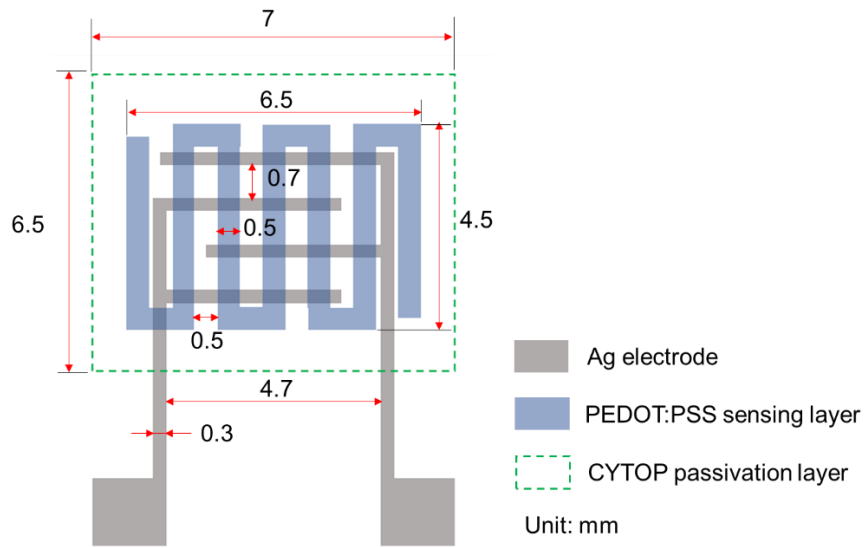

**Figure S1.** The geometry of the printed temperature sensor

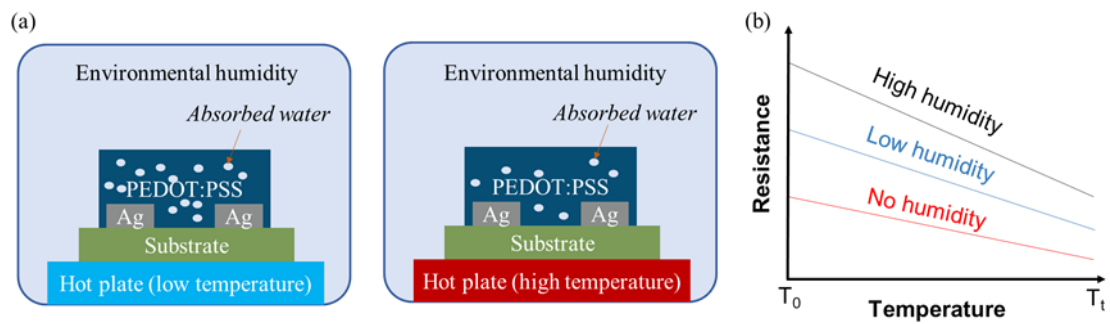

**Figure S2.** (a) illustration of humidity absorption and desorption of the temperature sensor. (b) illustration of resistance change of temperature sensor to the temperature and humidity.

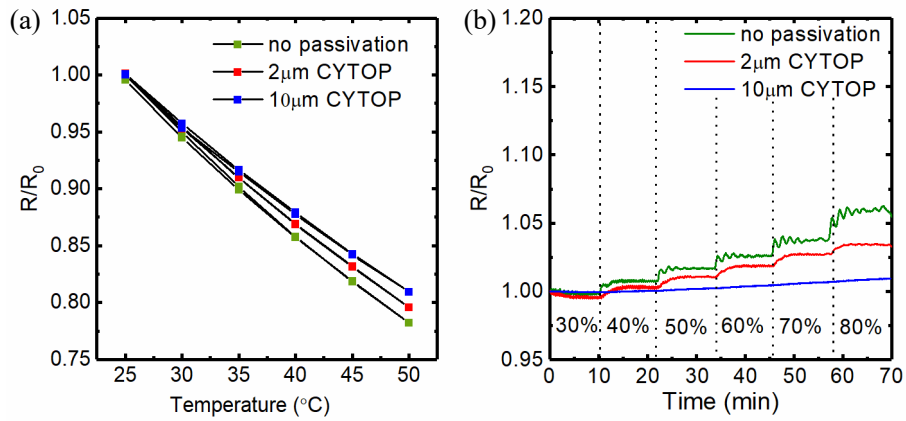

**Figure S3.** (a) Temperature-dependent relative resistance changes of temperature sensors with different thickness of passivation layers (no passivation,  $2\mu\text{m}$ , and  $10\mu\text{m}$ ). (b) humidity-dependent relative resistance changes of temperature sensors with different thickness of passivation layers (no passivation,  $2\mu\text{m}$ , and  $10\mu\text{m}$ ).

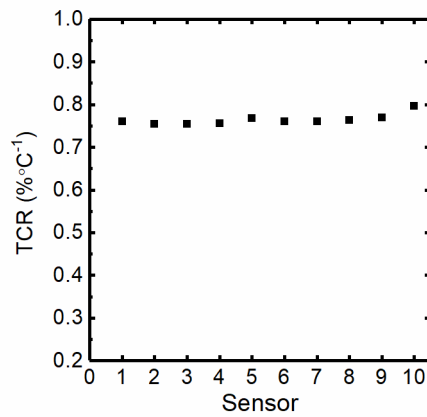

**Figure S4.** TCR of 10 printed sensors extracted from Figure 3d

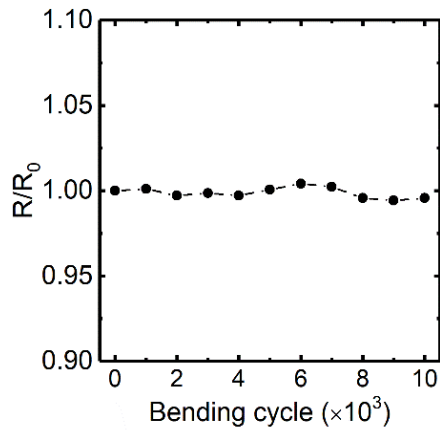

**Figure S5.** Relative resistance changes of printed temperature sensor concerning the bending cycles of up to 10000 cycles (5mm).

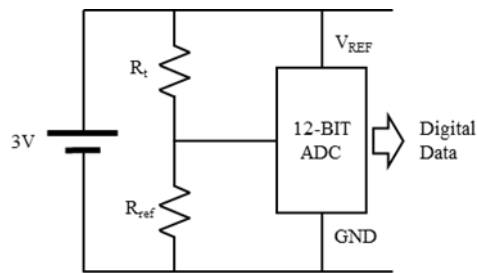

**Figure S6.** Simplified circuit diagram of the printed temperature sensor, the resistance of sensor ( $R_t$ ) and reference resistor ( $R_{ref}$ ) are  $75K\Omega$ ,

**Table S1.** Summary of some wearable temperature sensors and their power consumption.

| Sensitive Material <sup>a)</sup> | Power Consumption | Device type | Reference |
|----------------------------------|-------------------|-------------|-----------|
| Crosslinked PEDOT:PSS            | $30 \mu W$        | thermistor  | This work |
| Mg                               | $41 \mu W$        | thermistor  | [S1]      |
| CNT yarn                         | $4.4 mW$          | thermistor  | [S2]      |
| Au                               | $1 mW$            | thermistor  | [S3]      |

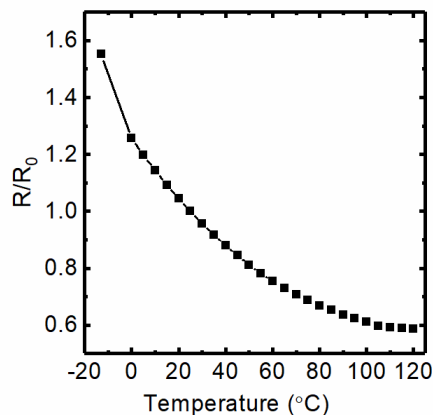

**Figure S7.** Temperature-dependent relative resistance changes of temperature sensors on extended temperature range. Sensor performance at the temperature below  $-13^{\circ}\text{C}$  was not measured, due to the limitation of measurement equipment.

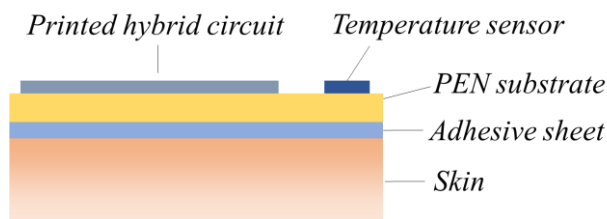

**Figure S8.** Illustration of the attachment of sensor on human skin

## References

- S1. Salvatore, GA. et al. Biodegradable and Highly Deformable Temperature Sensors for the Internet of Things. *Adv. Mater.* **27**, 1702390 (2017).
- S2. Dinh, T. et al. Environment-friendly carbon nanotube based flexible electronics for noninvasive and wearable healthcare. *J. Mater. Chem. C.* **4**, 10061 (2016).
- S3. Webb, CR. et al. Ultrathin conformal devices for precise and continuous thermal characterization of human skin. *Nat. Mater.* **12**, 938 (2013)
